# Supplementary material
Source: PubMed Central journal article supplement (PMC2441677)
Supplement: E07-12-1281_1.pdf [file E07-12-1281_1.pdf]

**SUPPLEMENTARY FIGURE LEGENDS**

**Supplementary Figure 1.** Expression of full-length or truncated Ytm1, Erb1, and Nop7 proteins. Yeast strains containing each of the galactose inducible full-length or truncated *YTM1* (A), *ERB1* (B) or *NOP7* (C) genes were grown at 30°C in synthetic medium containing 1% raffinose to  $\sim 1.5 \cdot 10^7$  cells/ml. Galactose was added to each strain to a final concentration of 1%. Cells were harvested after 4 hours induction (one doubling time). Cell lysates were prepared, separated by SDS-PAGE, and analyzed by western blotting using antibodies against the HA tag (top), or Sec61 (bottom) as a loading control.

**Supplementary Figure 2.** Subcellular localization of Ytm1, Erb1, or Nop7 truncations. Cells expressing HA-tagged truncations of Ytm1 (A), Erb1 (B), or Nop7 (C) were harvested, fixed, permeabilized, and analyzed by indirect immunofluorescence microscopy with a monoclonal anti-HA antibody (green). Also shown is the position of the nucleus visualized by DAPI staining (red) and a wild-type control strain containing no HA-tagged proteins (D).

**Supplementary Figure 3.** Preribosomes co-purify with Ytm1-C, Erb1-N, Erb1-C2, and Nop7-M. Cell lysates were prepared from yeast strains expressing each of the TAP-tagged truncated proteins. Proteins associated with each truncated protein were purified by tandem affinity purification, resolved by SDS-PAGE, and subjected to western blot analysis using antibodies against Ebp2 and Cic1, two assembly factors present in 66S preribosomal particles. Preribosomes purified using Rpf2-TAP were used as a positive control.

**Supplementary Figure 4.** Erb1 is a WD40 repeat-containing protein. Predicted amino acid sequence of *S. cerevisiae* Erb1 is shown. The seven WD40 repeats are overlined.

**A**

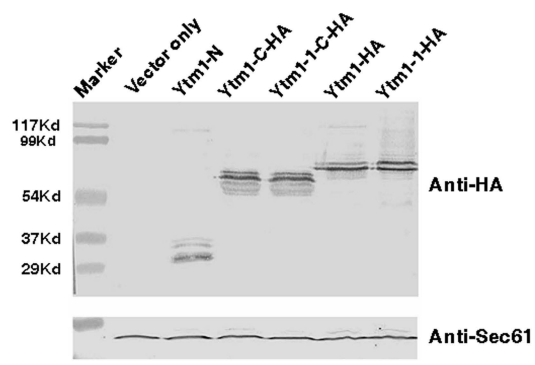

**B**

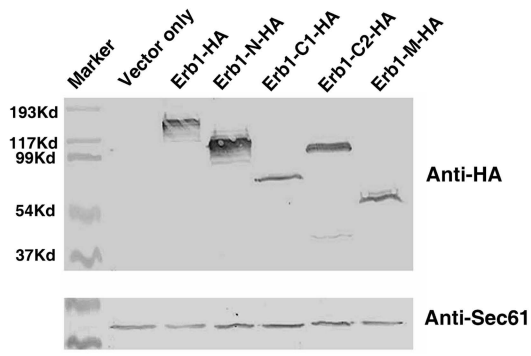

**C**

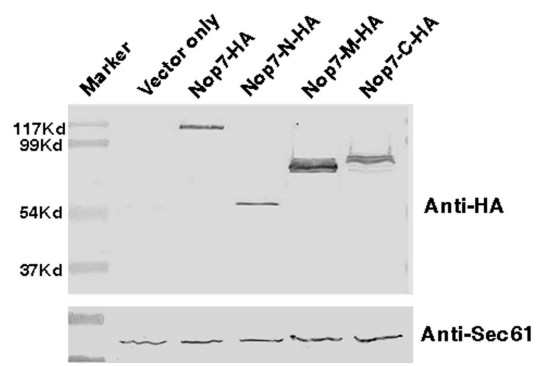

Supplementary Figure 1

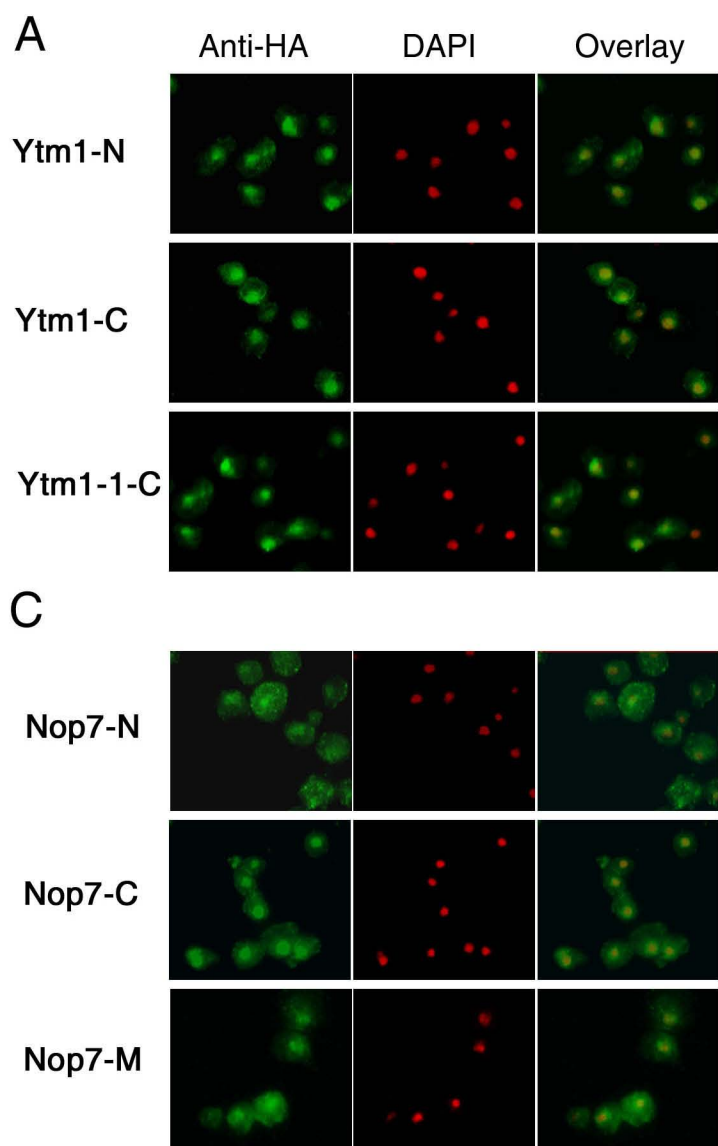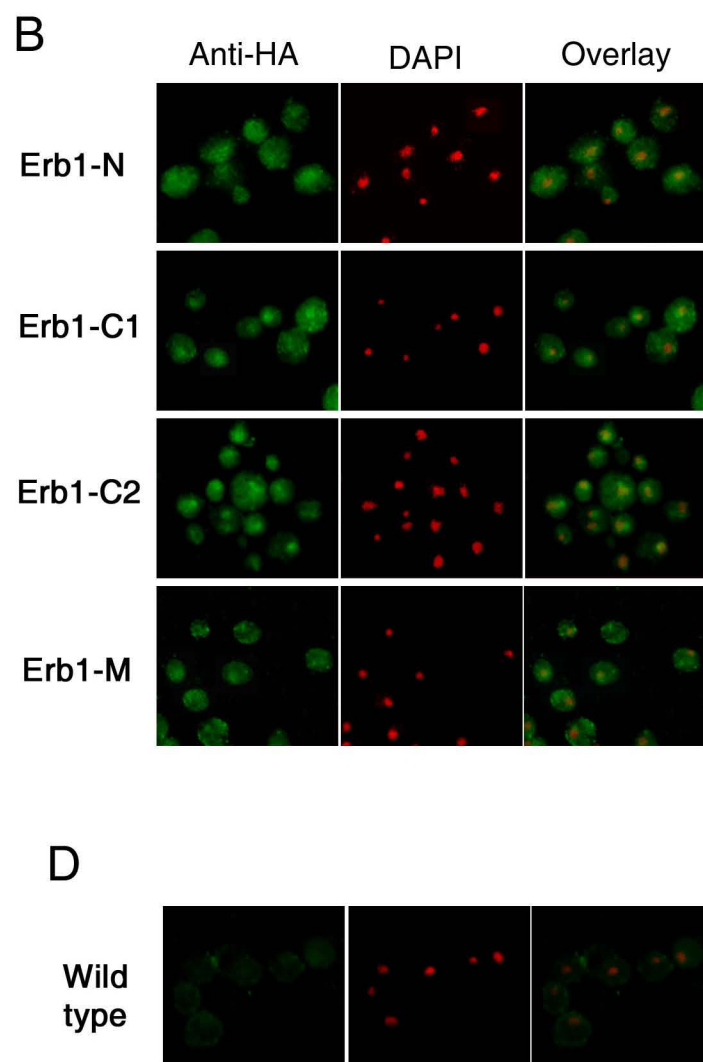

Supplementary Figure 2

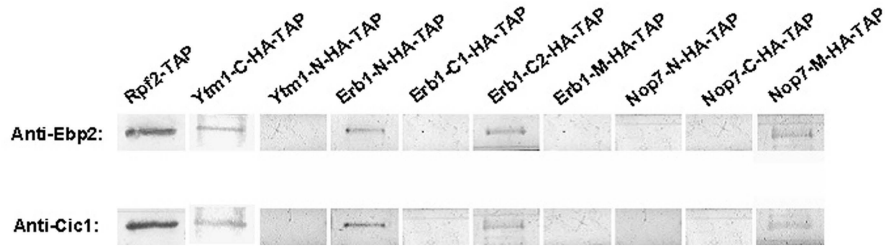

Supplementary Figure 3

```

1  MMAKNNKTE AKMSKKRAAS EESDVEEDED KLLSVDGLID AEASESDEDD
51  DEYESAVEEK ESSSDKEAQD DSDDSDAEL NKLLAEEEGD GEBDYDSSEF
101 SDDTTSLTDR LSGVKLQTIY DPNIYSKYAD GSDRIIKPEI NFWYDSDSD
151 APTQNTIGNI PLSAYDEMPH IGYDINGKRI MRPAKGSALD QLDSIELPE
201 GWTGLLDKNS GSSLNLTKEE LELISKIQRN EQTDDSIINPY EPLIDWFTRH
251 EEVWPLTAVP EPKRRFVPSK NEAKRVMKIV RAIREGRIIP PKKLEKMEK
301 EKIEVYQYDL WGDSTETNDH VMHLRAPKLP PPTNEESYNP PEEYLLSPEE
351 KEAWNTEYS ERERNFIPOK YSALRKVPGY GESIRERFER SLDLYLAPRV
401 RKNKLNIDFN SLIPELPSPK DLRPFFIRCE TIYAGHRGV RTLSIDPSGL
451 WLATGSDDGT VRVWEILTGR EVYRRTLIDD EENPDYHIEC IEWNPDANN
501 ILAVAVGENI HLIVPPIFGY DIENNGKTKI EDGFGYDIFG TVKKSNELVN
551 ENGDGDEGE NESAKNAVKK QVAQWNKPSQ KQLEKDICIT ISCKKTVKKL
601 SWHRKGDYFV TVQPDSGNTS VLIHQVSKHL TQSPFKRSKG IIMDAKFHPF
651 KPQLFVCSQR YVRIYDLSQQ ILVKLLPGA RMLSKIDIHP RGDNLIASPF
701 DKRVLWHDLD LASTPYKTLR YHEKAVRSVN FHKLPLFSS AADDGTIHFV
751 HATVYDDMMK NPMIVPLKKL TGHKVINSLG VLDAIWHPRE AWFLSAGADN
801 TARLWTT*

```

Supplementary Figure 4
